# Supplementary material for: Functional Redundancy and Specialization of the Conserved Cold Shock Proteins in Bacillus subtilis
Source: MDPI journal article supplement (doi:10.3390/microorganisms9071434), 2021-07-02
Supplement: s1 [file s1]

**Table S1.** Oligonucleotides used in this study

| Primer                                        | Sequence 5' → 3'                                                                                                                          |
|-----------------------------------------------|-------------------------------------------------------------------------------------------------------------------------------------------|
|                                               | <i>Homologous bases for joining PCR are bold</i><br><i>Restriction sites are underlined</i><br><i>Shine-Dalgarno sequences are italic</i> |
| <b>Deletion and sequencing of <i>cspB</i></b> |                                                                                                                                           |
| PF41                                          | ATGATCGGAATTCTGGGGCTG                                                                                                                     |
| PF42                                          | <b>CCTATCACCTCAAATGGTTCGCTG</b> GCATAAATTGATATGAAAACTGCAGGTG                                                                              |
| PF43                                          | <b>CCGAGCGCCTACGAGGAATTTGTATCGT</b> GAAATTCCTCCTAAAGCGATCATAAC                                                                            |
| PF44                                          | ACAGCTTTTAATTCAGGTGTCTCG                                                                                                                  |
| PF45                                          | ACAAAATCATTAGAGGACCGTTTCTTAG                                                                                                              |
| PF46                                          | ATGAGTCCGCCGCTCTTAG                                                                                                                       |
| cat- fwd (kan)                                | <b>CAGCGAACCATTTGAGGTGATAGG</b> CGGCAATAGTTACCCTTATTATCAAG                                                                                |
| cat-rev (kan)                                 | <b>CCGAGCGCCTACGAGGAATTTGTATCG</b> CCAGCGTGGACCGGCGAGGCTAGTTACCC                                                                          |
| Tc fwd2                                       | <b>CAGCGAACCATTTGAGGTGATAGG</b> GCTTATCAACGTAGTAAGCGTGG                                                                                   |
| Tc rev                                        | <b>CCGAGCGCCTACGAGGAATTTGTATCG</b> GAACTCTCTCCCAAAGTTGATCCC                                                                               |
| <b>Deletion and sequencing of <i>cspC</i></b> |                                                                                                                                           |
| PF47                                          | GAAGGGCAGGTACGGAAGATAG                                                                                                                    |
| PF48                                          | <b>CCTATCACCTCAAATGGTTCGCTG</b> TTGTTGCCTCCTAGTGTGTAACC                                                                                   |
| PF49                                          | <b>CCGAGCGCCTACGAGGAATTTGTATCGT</b> CTTCAATCGTTTATACAAACAGGCTC                                                                            |
| PF50                                          | TACGACCAGTTACCGATATACTTGC                                                                                                                 |
| PF51                                          | TGAACAGGAGATTTAATGCTTTCTGATG                                                                                                              |
| PF52                                          | ACGGAGCAGGTATAATTGAAGCC                                                                                                                   |
| spec-fwd (kan)                                | <b>CAGCGAACCATTTGAGGTGATAGG</b> GACTGGCTCGCTAATAACGTAACGTGACTGGCAAG<br>AG                                                                 |
| spec-rev (kan)                                | <b>CGATACAAATTCCTCGTAGGCGCTCGG</b> CGTAGCGAGGGCAAGGGTTTATTGTTTTCTAAA<br>ATCTG                                                             |

| Deletion and sequencing of <i>cspD</i>           |                                                                  |
|--------------------------------------------------|------------------------------------------------------------------|
| MB17                                             | CGCCGAACTGGAAGAGTCATTCC                                          |
| MB18                                             | <b>CCTATCACCTCAAATGGTTCGCTGGTTGAACCATTTACTTTACCGTTTTGCAT</b>     |
| MB19                                             | <b>CCGAGCGCCTACGAGGAATTTGTATCGGTAATCGTGGACCTCAAGCTTCTAATGTTG</b> |
| MB20                                             | GAAGCACTCCTTGAATCGCTGAAGC                                        |
| MB21                                             | GGCGAACTTGTCGATGAACATCAG                                         |
| MB22                                             | GGCAGCTGGCCTTGTTATGATC                                           |
| kan fwd                                          | AAAGAATTCGATAAACCCAGCGAACCATTGTA                                 |
| kan rev                                          | TTTGAATTCATCGATACAAATTCCTCGTAGGC                                 |
| Deletion and sequencing of <i>veg</i>            |                                                                  |
| PF116                                            | TCAAGAGTCAATATTCATGCGCTTG                                        |
| PF119                                            | CTGGTGGCAGTGAAAAAGGATG                                           |
| PF120                                            | <b>CCGAGCGCCTACGAGGAATTTGTATCGTTGCATCCACCTCACTACATTATTG</b>      |
| PF121                                            | <b>CCTATCACCTCAAATGGTTCGCTGTTGTTTACTGCTTTTTGTTTTGCCC</b>         |
| PF122                                            | GAAACGTCAGAGCCAATTTCCG                                           |
| PF123                                            | GTTTCGAATTATAGGAATAGAGCAAACAAG                                   |
| PF124                                            | AGCAGTTGAAACACCGATTGTC                                           |
| mls-fwd                                          | <b>CAGCGAACCATTGAGGTGATAGGGATCCTTTAACTCTGGCAACCCTC</b>           |
| mls-rev                                          | <b>CGATACAAATTCCTCGTAGGCGCTCGGGCCGACTGCGCAAAAGACATAATCG</b>      |
| Construction of $P_{cspB}$ - <i>lacZ</i> fusions |                                                                  |
| PF151                                            | TTTGAATTCTCATACGCTCTCTTAGTTGATAAACGT                             |
| PF152                                            | TTTGGATCCAACATGAAATTTCTCCTAAAGCGATC                              |
| Construction of $P_{cspC}$ - <i>lacZ</i> fusion  |                                                                  |
| PF97                                             | TTTGAATTCAGGGGGCTTTGCGATTGAG                                     |
| PF98                                             | TTTGGATCCTCTAAAGATTTGAATCCGTCACTTTGG                             |

|                                                                                                                           |                                                                    |
|---------------------------------------------------------------------------------------------------------------------------|--------------------------------------------------------------------|
| <b>Construction of P<sub>cspD</sub>-<i>lacZ</i> fusion</b>                                                                |                                                                    |
| PF246                                                                                                                     | AGGGTATGTTTCTCTTTGATGTCTTTTG                                       |
| PF247                                                                                                                     | CGGCAATAGTTACCCTTATTATCAAGATAAG                                    |
| PF248                                                                                                                     | <b>CTTATCTTGATAATAAGGGTAACTATTGCCG</b> TCAGCCATCAATAAAAAGCGGTTAC   |
| PF249                                                                                                                     | <b>GTCACGACGTTGTAAAACGACGGGATCCCC</b> GTTGAACCATTTTACTTTACCGTTTTGC |
| PF250                                                                                                                     | GGGGATCCCGTCGTTTTACAA                                              |
| PF251                                                                                                                     | AACAAAATTCTCCAGTCTTCACATCG                                         |
| <b>Construction of P<sub>veg</sub>-<i>lacZ</i> fusions</b>                                                                |                                                                    |
| PF127                                                                                                                     | AAAGAATTCAGAGAAAGGGCTTGGAGGTATTG                                   |
| PF118                                                                                                                     | TTTGGATCCCCTAAATTCCCATCAAGCGATCTTTT                                |
| <b>Construction of CspC[A58P] variant</b>                                                                                 |                                                                    |
| PF178                                                                                                                     | [5' Phosphorylated]ACGTTAGCAGCTTGAGGTCCACGAG                       |
| <b>Qualitative PCR for <i>manR-manP</i>, <i>liaH-liaG</i>, <i>pyrR-pyrP</i>, <i>pyrP-pyrB</i> readthrough transcripts</b> |                                                                    |
| PF190                                                                                                                     | GTTTAAACAAGCCATTTTGAATCGTGA                                        |
| PF191                                                                                                                     | CAATCGCATGAACAGTACCGC                                              |
| PF192                                                                                                                     | GAGGTTCGTA CTGCCAGATCAC                                            |
| PF193                                                                                                                     | GCTGAAGTGGCTGGCAAAC                                                |
| PF196                                                                                                                     | GAACGCATTGAACAGATTGAGGG                                            |
| PF197                                                                                                                     | CAGCCATCCTGTTCCAAGCT                                               |
| PF198                                                                                                                     | CTGAGCAAGGTTGTCTGGACA                                              |
| PF199                                                                                                                     | AGACGTCCACACCGATTGATTC                                             |
| <b>Quantative PCR for <i>manR-manP</i>, <i>liaH-liaG</i>, <i>pyrR-pyrP</i>, <i>pyrP-pyrB</i> readthrough transcripts</b>  |                                                                    |
| PF201                                                                                                                     | AGCTGACGAAAGAAACCAATGT                                             |
| PF202                                                                                                                     | CGAAATCAGCTCATTAAAATCGC                                            |
| PF203                                                                                                                     | ACCGGCAGTGATCAACAGTT                                               |
| PF204                                                                                                                     | GCGGCAAATGAATAAGCGGA                                               |

|       |                        |
|-------|------------------------|
| PF205 | GGTCTTTGTATGCCTCTTTGCG |
| PF206 | CCCAAGAGAAAGGTGTCGGG   |
| PF207 | CAGAGAGGCTTGGAAGGGTT   |
| PF208 | GCTAAGTTCATCATCGTCGT   |
